# Supplementary material
Source: publisher site journal article supplement (https://www.dovepress.com/article/334482)
Supplement: Supplementary file 1 [file get_supplementary_file.php]

# Label-free iron oxide nanoparticles as multimodal contrast agents in cells using multi-photon and magnetic resonance imaging.

Hendrik Reynders<sup>1</sup>, Indra Van Zundert<sup>1, a</sup>, Rui Silva<sup>1,2,5</sup>, Bram Carlier<sup>5</sup>, Olivier Deschaume<sup>3</sup>, Carmen Bartic<sup>3</sup>, Susana Rocha<sup>1</sup>, Sergey Basov<sup>4</sup>, Margriet J. Van Bael<sup>4</sup>, Uwe Himmelreich<sup>5</sup>, Thierry Verbiest<sup>1</sup> and Ana Zamora<sup>1,5</sup>

<sup>1</sup> *Molecular Imaging and Photonics, KU Leuven, Leuven, Belgium;*

<sup>2</sup> *Engineering Department, Oporto University, Porto, Portugal;*

<sup>3</sup> *Laboratory for Soft Matter and Biophysics, KU Leuven, Leuven, Belgium;*

<sup>4</sup> *Department of Quantum Solid State Physics, KU Leuven, Leuven, Belgium;*

<sup>5</sup> *Department of Imaging and Pathology, KU Leuven, Leuven, Belgium.*

Corresponding author: Ana Zamora

E-mail: [anamaria.zamoramartinez@kuleuven.be](mailto:anamaria.zamoramartinez@kuleuven.be)

ORCID: 0000-0001-7013-8900

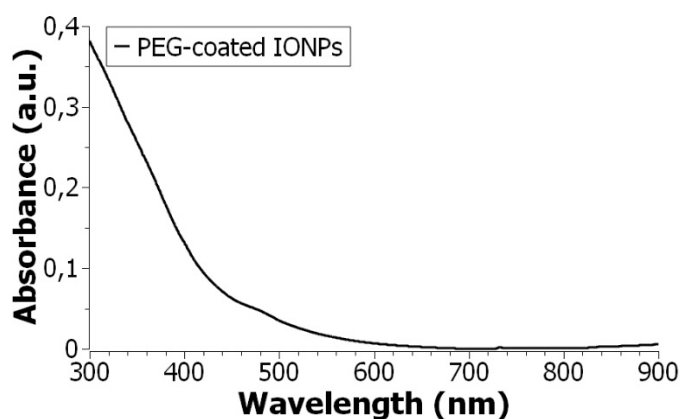

**Figure S1.** UV/Vis absorption spectrum of PEG-coated IONPs in dH<sub>2</sub>O (0.01 mg of Fe/mL).

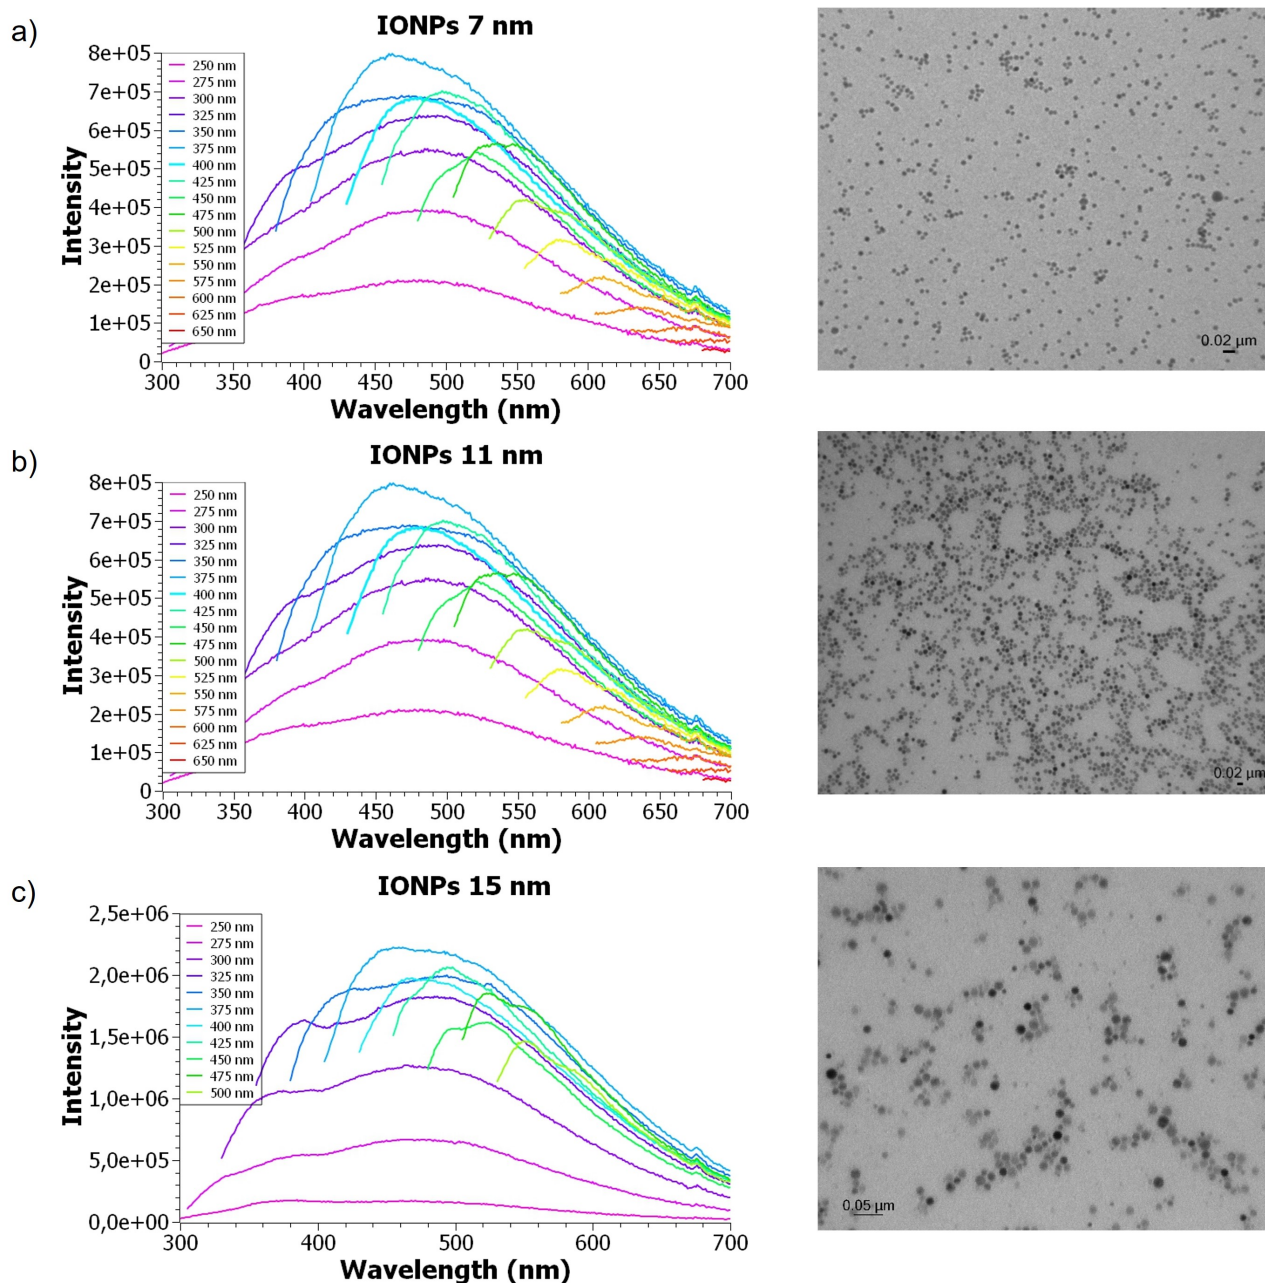

**Figure S2.** One-photon emission spectra (left) of OA-IONPs dispersed in heptane with an average diameter of a) 7 nm, b) 11 nm and c) 15 nm at different excitation wavelengths, and their respective TEM-images (right). The iron concentration for all samples was kept at 0.1 mg/mL.

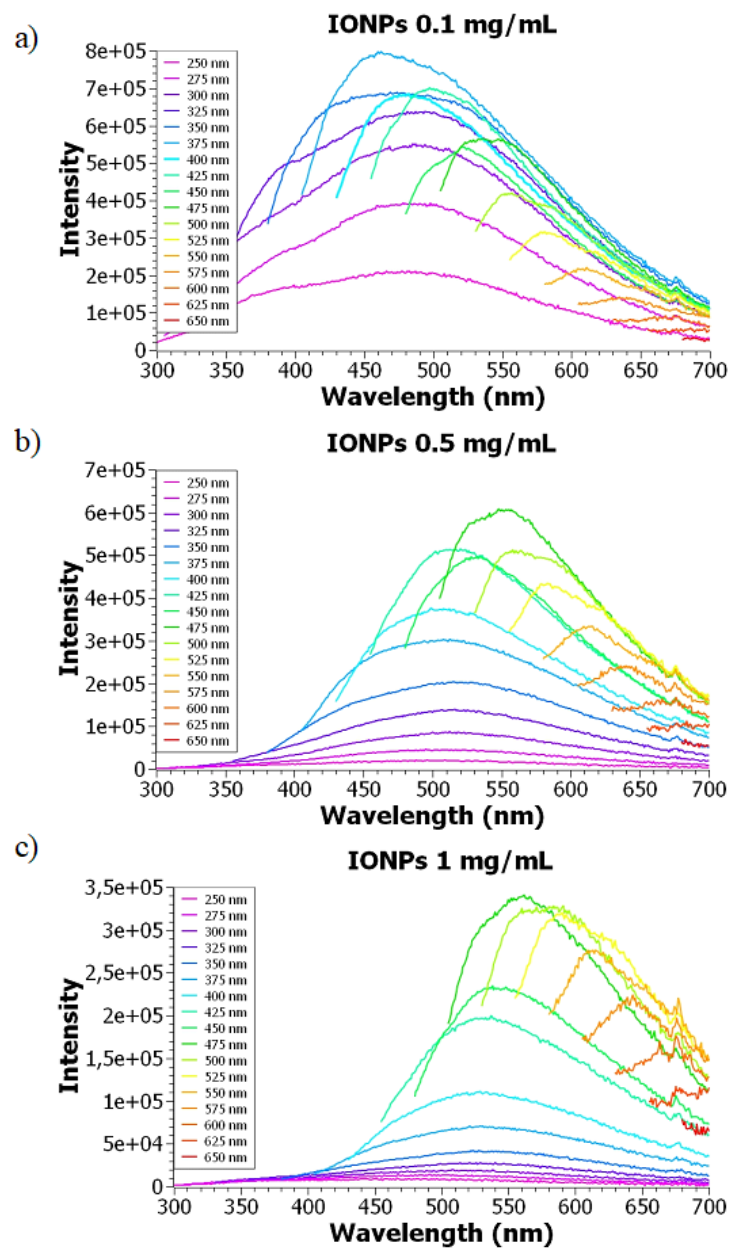

**Figure S3.** One-photon emission spectra of OA-IONPs dispersed in heptane with a concentration of a) 0.1 mg/mL, b) 0.5 mg/mL and c) 1 mg/mL at different excitation wavelengths.

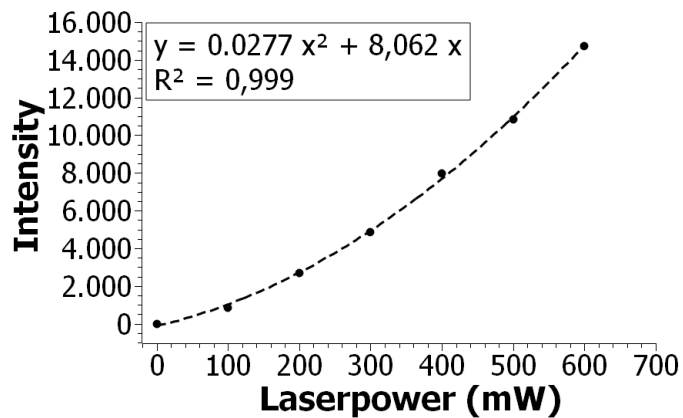

**Figure S4.** Plot of the multi-photon emission intensity of PEG-coated IONPs in function of the incident laser power. The quadratic dependence confirms that the multi-photon emission is a two-photon process.

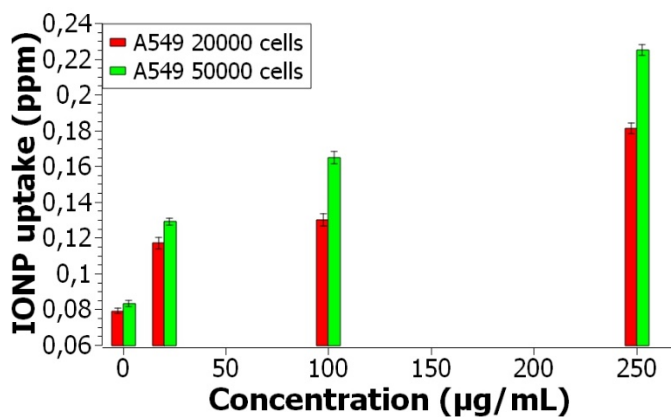

**Figure S5.** Cell uptake in A549 cells after 24 h incubation. Samples with 2 cell counts of 20000 and 50000 cells and with different PEG-coated IONPs concentrations added from 0 to 250 µg/mL were digested and the iron content was quantified with ICP-MS.

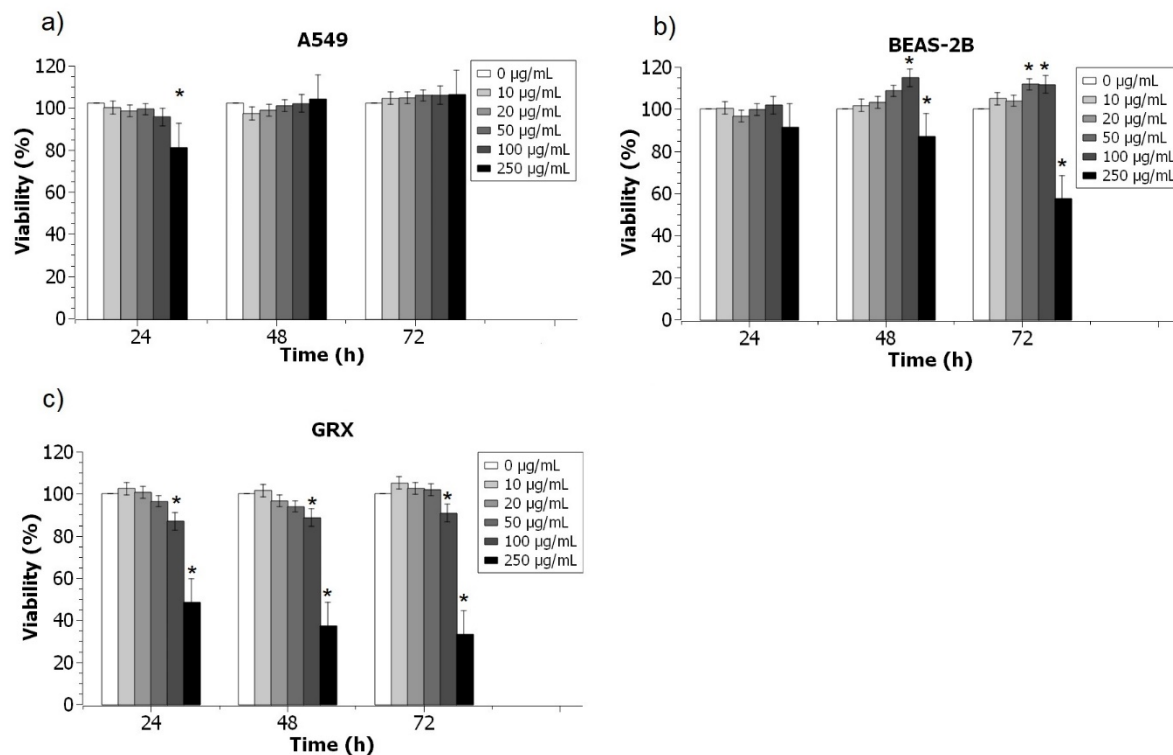

**Figure S6.** XTT cytotoxicity assay of a) A549 cells, b) BEAS-2B cells and c) GRX cells incubated with PEG-coated IONPs at different concentrations for 24 h, 48 h and 72 h, respectively). Data was collected from two independent experiments with three replicates per sample and analyzed with Two-Way ANOVA with Bonferroni post-Hoc test: Interaction ( $P > 0.05$ ) and One-Way ANOVA with Dunnett's post-Hoc: (\*  $P < 0.05$  and difference  $> 10\%$ )

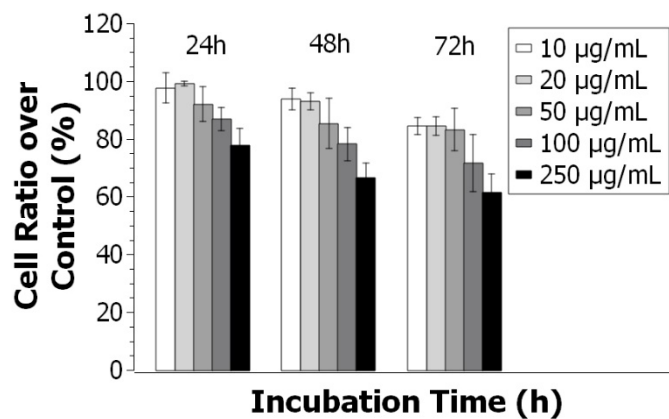

**Figure S7.** Cell ratio over control (cells without NPs treatment) after the incubation of A549 cells with PEG-coated IONPs at different concentrations for different durations. The decrease of cell ratio when increasing the concentration of PEG-IONPs indicates that cell replication stopped and therefore that PEG-IONPs present some toxicity at high concentration.

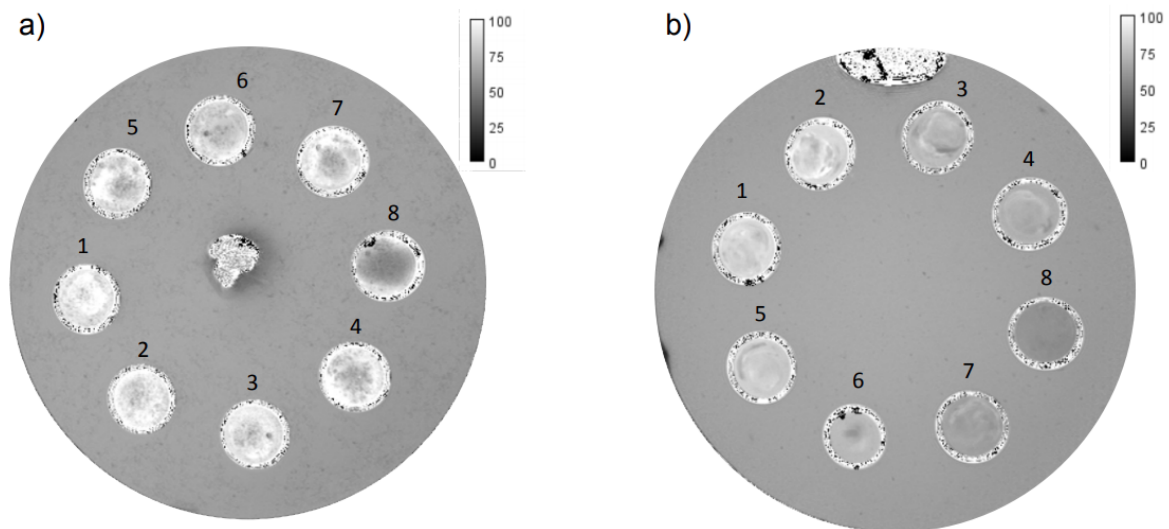

**Figure S8.** T2 maps of A549 cells labeled with PEG-coated IONPs. a) Eppendorfs 1 to 4 (50 cells/mL) and 5 to 8 (100 cells/mL) and Fe concentration of 0 (1 and 5), 50 (2 and 6), 100 (3 and 7) and 250 ug/mL (4 and 8); b) Eppendorfs 1 to 4 (250 cells/mL) and 5 to 8 (400 cells/mL) and Fe concentration of 0 (1 and 5), 50 (2 and 6), 100 (3 and 7) and 250 ug/mL (4 and 8).
